# Supplementary material for: Resveratrol Demonstrates Antimicrobial Effects Against Propionibacterium acnes In Vitro
Source: PubMed Central journal article supplement — Dermatol Ther (Heidelb). 2014 Sep 17;4(2):249–57. doi: 10.1007/s13555-014-0063-0 (PMC4257953; doi:10.1007/s13555-014-0063-0), 2014-09-17
Supplement: 13555_2014_63_MOESM1_ESM.pdf [file 13555_2014_63_MOESM1_ESM.pdf]

- Resveratrol, an antioxidant with antimicrobial properties, may be a viable treatment for acne vulgaris.
- In this *in vitro* study, colony forming unit assays together with transmission electron microscopy using *P. acnes* treated with resveratrol or benzoyl peroxide were used to assess antibacterial effects.
- Resveratrol had a sustained antibacterial activity against *Propionibacterium acnes*, and benzoyl peroxide had short-term bactericidal activity against *P. acnes* that could be effectively combined with resveratrol.
- Electron microscopy revealed that resveratrol alters the membrane structure of *P. acnes*.
- Resveratrol was significantly less cytotoxic to keratinocytes and monocytes than benzoyl peroxide.

This summary slide represents the opinions of the authors. Sponsorship for this study was funded by The Women's Dermatologic Society Academic Research Grant. For a full list of acknowledgments and conflicts of interest for all authors of this article, please see the full text online. Copyright © The Authors 2014. Creative Commons Attribution Noncommercial License (CC BY-NC).
